# Supplementary material for: Arylfluorene based universal hosts for solution-processed RGB and white phosphorescent organic light-emitting devices
Source: Royal Society of Chemistry journal article supplement (doi:10.1039/c5ra19231e), 2015-01-01
Supplement: c5ra19231e1.pdf [file c5ra19231e1.pdf]

# Supporting Information

## Arylfluorene based universal hosts for solution-processed RGB and white phosphorescent organic light-emitting devices

Xinwen Zhang,<sup>‡a</sup> Tao Yang,<sup>‡a</sup> Qi Wei,<sup>‡a</sup> Yuehua Chen,<sup>a</sup> Xin Guo,<sup>a</sup> Linghai Xie,<sup>a</sup>  
Wenyong Lai,<sup>a</sup> Quli Fan,<sup>a</sup> Yan Qian,<sup>\*a</sup> Wei Huang,<sup>\*ab</sup>

<sup>a</sup> Key Laboratory for Organic Electronics and Information Displays & Institute of Advanced Materials, Jiangsu National Synergetic Innovation Center for Advanced Materials, Nanjing University of Posts & Telecommunications, Nanjing 210023, China

E-mail: iamyqian@njupt.edu.cn

<sup>b</sup> Key Laboratory of Flexible Electronics & Institute of Advanced Materials, Jiangsu National Synergetic Innovation Center for Advanced Materials, Nanjing Tech University, Nanjing 211816, China

E-mail: iamwhuang@njtech.edu.cn

<sup>‡</sup> These authors contributed equally to this work.

### 1. Thermal stabilities of AFs/cabazole hybrid compounds

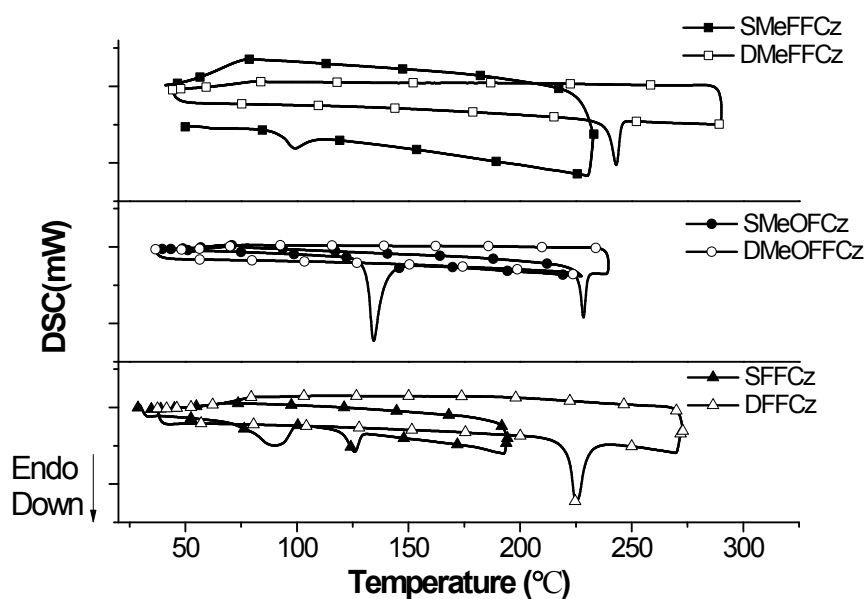

Fig. S1. The DSC curves of AFs/cabazole hybrid compounds

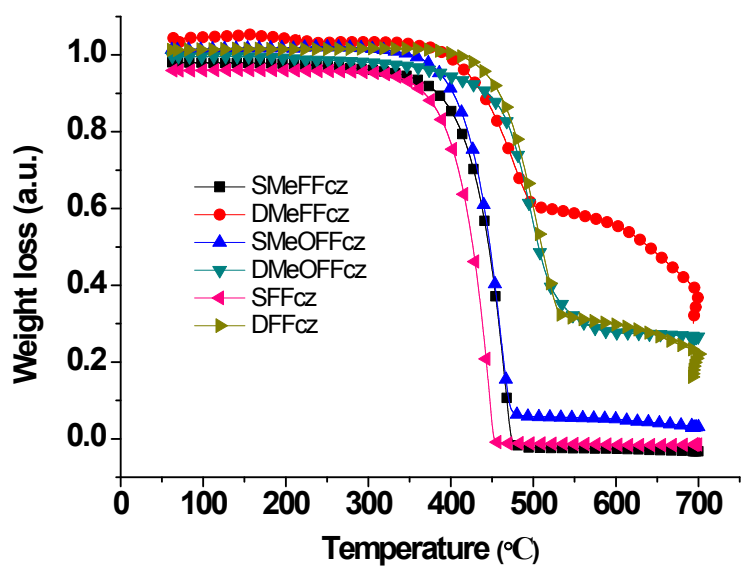

Fig. S2. The TG curves of AFs/cabazole hybrid compounds.

## 2. Cyclic voltammetry curves of AFs/cabazole hybrid compounds

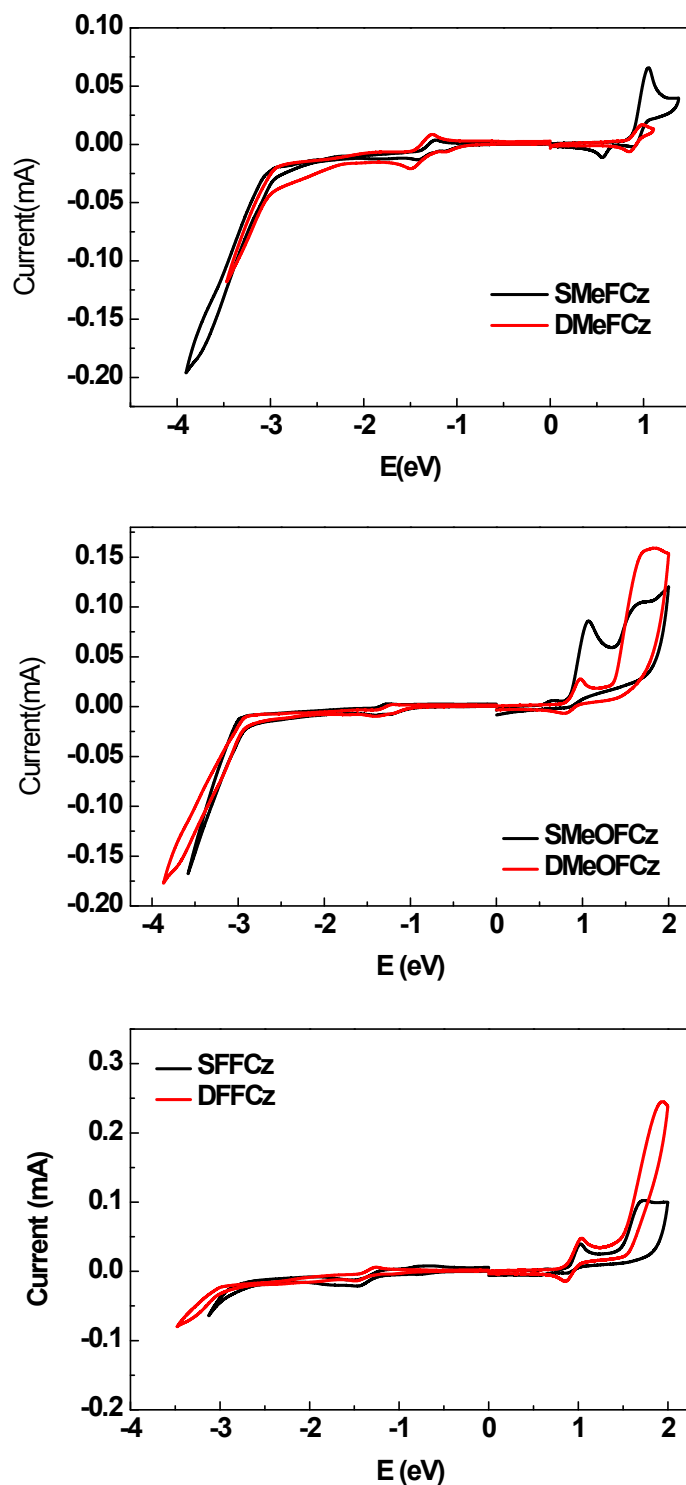

**Fig. S3.** Oxidative and reductive cyclic voltammetry plots of AFs/cabazole hybrid compounds, measured in  $\text{CH}_2\text{Cl}_2$  and THF solutions, respectively, with  $\text{Bu}_4\text{NPF}_6$  as the electrolyte and ferrocene/ferrocenium ( $\text{Fe}/\text{Fe}^+$ ) couple as internal reference.

### 3. Electroluminescent Properties of phosphorescent OLEDs

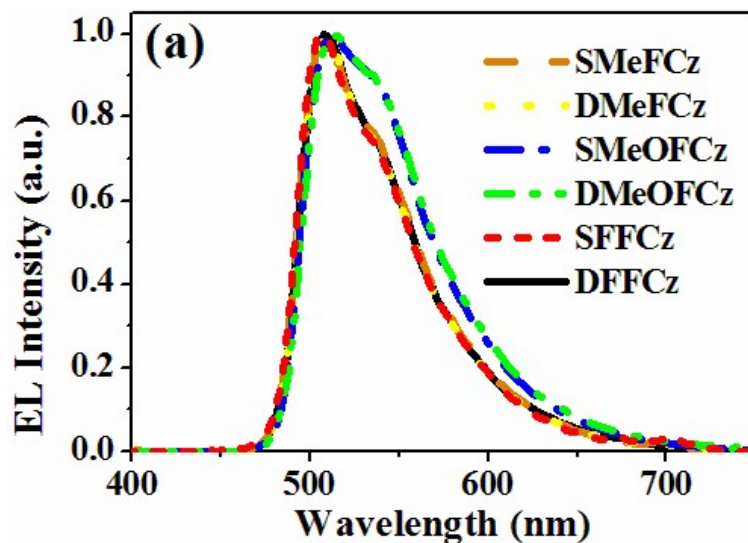

Fig. S4. Normalized EL spectra of green OLEDs based on AFs/cabazole host materials.

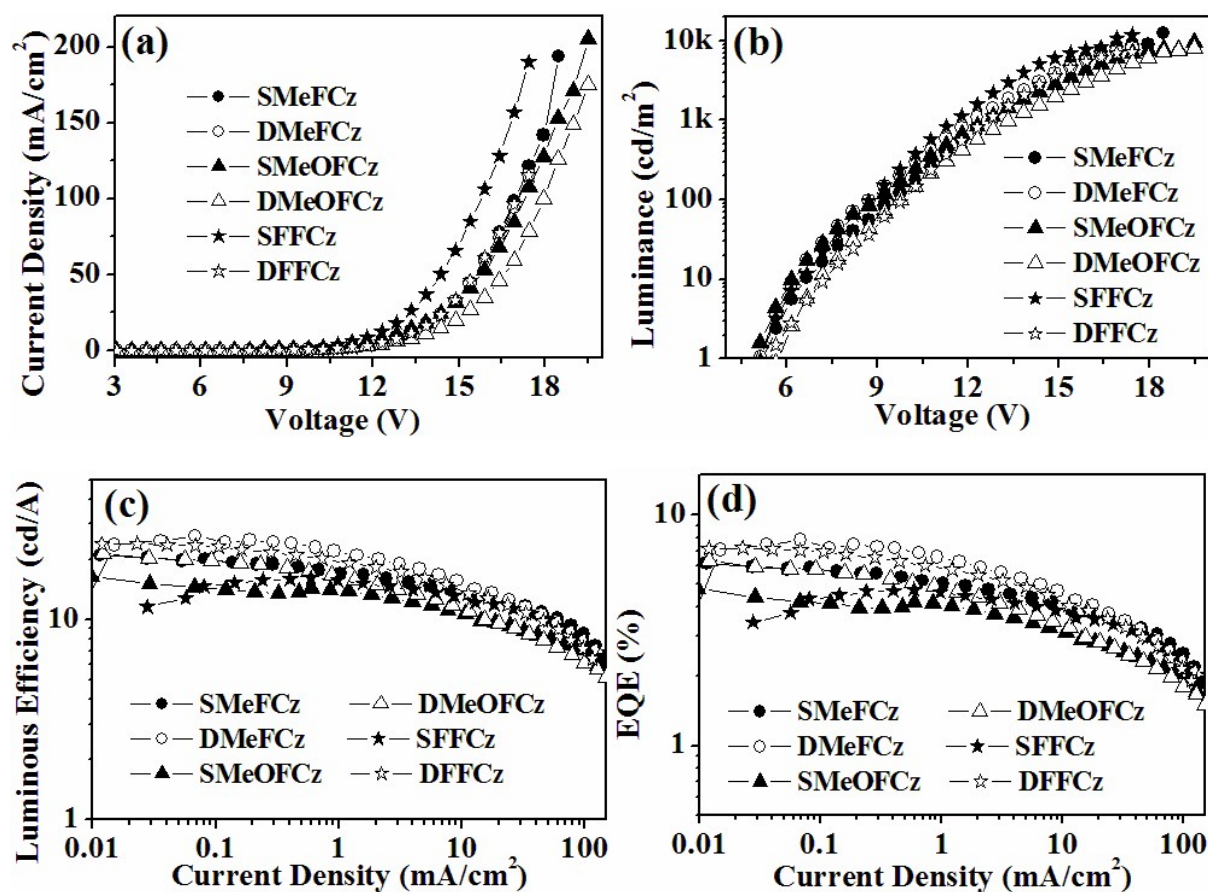

Fig. S5. Device characteristics of the solution-processed green phosphorescent OLEDs based on AFs/cabazole host materials: (a) current density-voltage, (b) luminance-voltage, (c) luminous efficiency- current density and (d) EQE- current density.

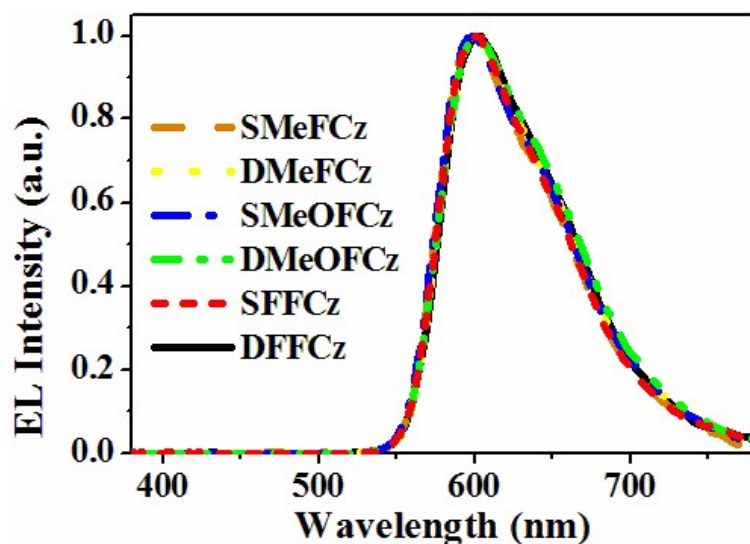

Fig. S6. Normalized EL spectra of red OLEDs based on AFs/cabazole host materials.

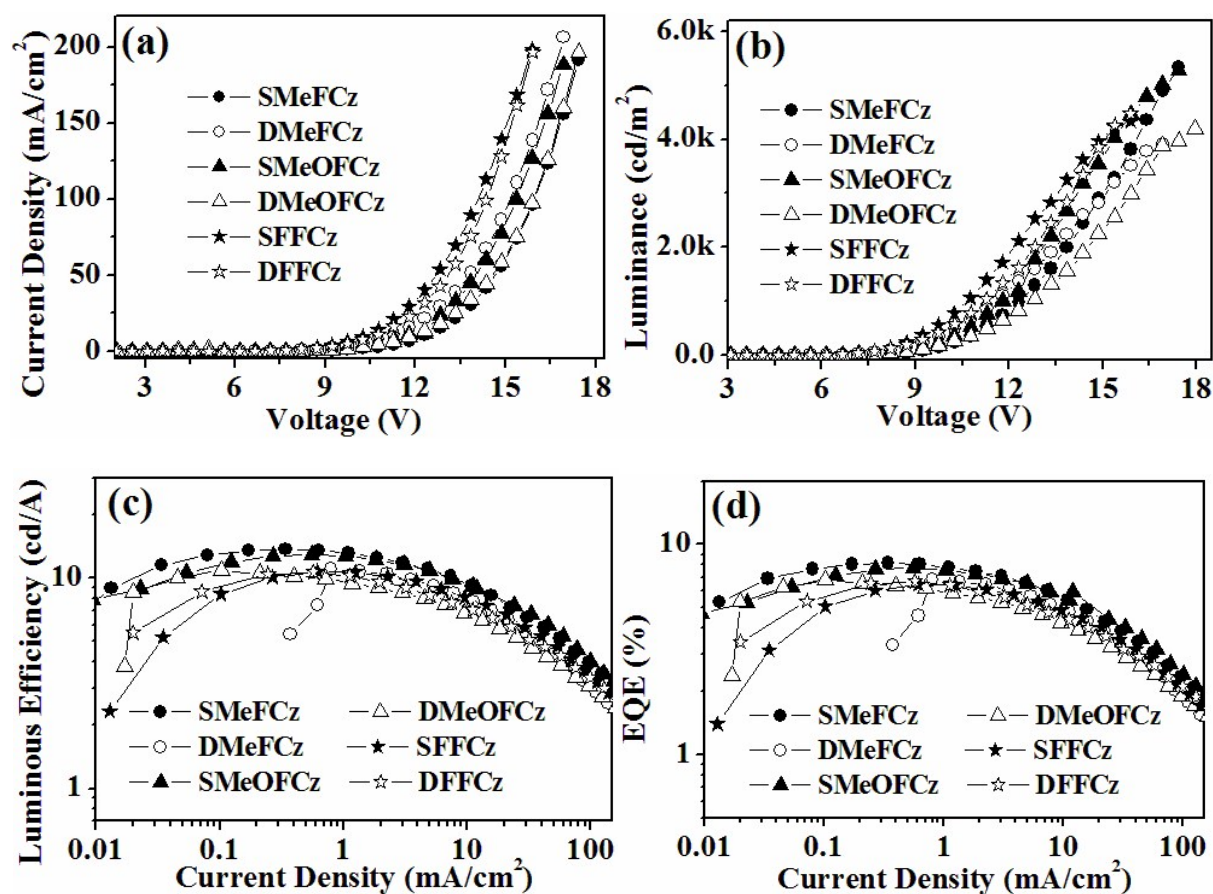

Fig. S7 Device characteristics of the solution-processed red phosphorescent OLEDs based on AFs/cabazole host materials: (a) current density-voltage, (b) luminance-voltage, (c) luminous efficiency- current density and (d) EQE- current density.

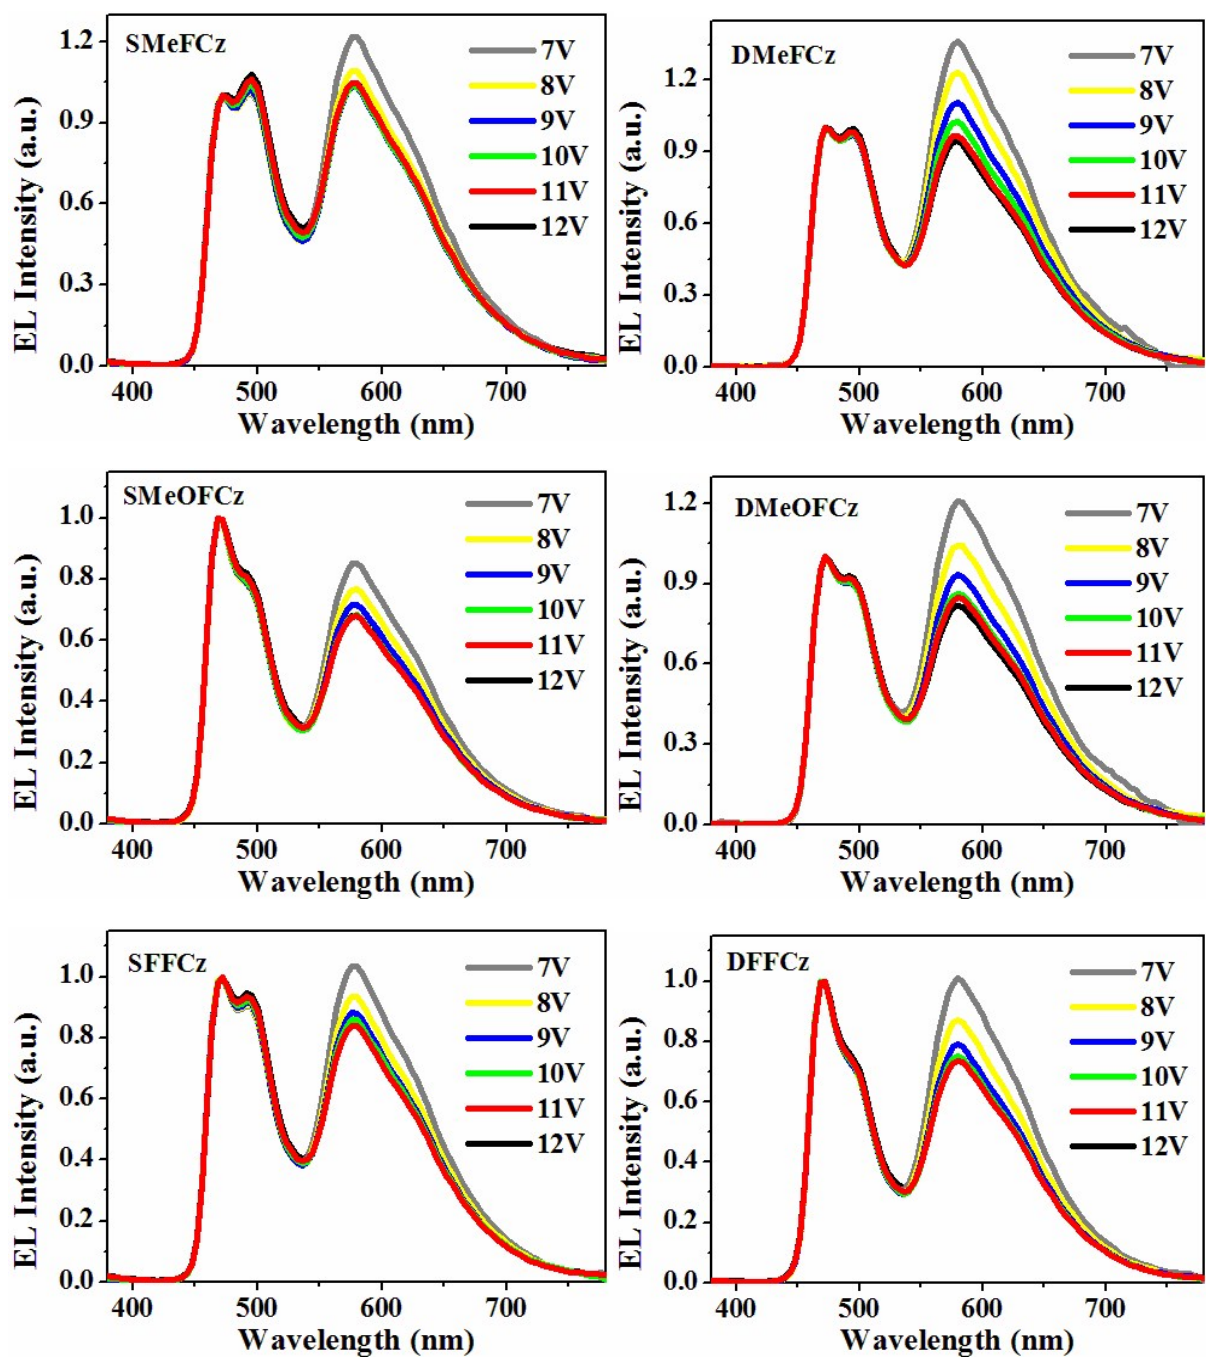

Fig. S8 Normalized EL spectra of white OLEDs based on AFs/cabazole host materials.
